# Supplementary material for: Evaluation of shaping ability, apical transportation and centering ratio of T-Endo Must, WaveOne Gold, and Trunatomy in resin blocks
Source: PeerJ. 2024 Oct 14;12:e18088. doi: 10.7717/peerj.18088 (PMC11485059; doi:10.7717/peerj.18088)
Supplement: Supplemental Information 1 [file peerj-12-18088-s001.xlsx]

## Sheet: veri 1
File	minutes	Second	split second
Waveone Gold	1	17	0
Waveone Gold	1	17	0
Waveone Gold	1	27	0
Waveone Gold	1	24	0
Waveone Gold	1	31	9
Waveone Gold	1	25	7
Waveone Gold	1	29	8
Waveone Gold	1	25	9
Waveone Gold	1	12	2
Waveone Gold	1	18	3
Waveone Gold	1	12	9
Waveone Gold	1	23	8
Waveone Gold	1	12	6
Waveone Gold	1	22	3
Waveone Gold	1	13	3
Waveone Gold	1	15	5
Waveone Gold	1	19	9
Waveone Gold	1	14	6
Waveone Gold	1	16	1
Waveone Gold	1	20	8
Waveone Gold	1	22	6
Waveone Gold	1	24	6
T-Endo Must	1	44	8
T-Endo Must	1	48	3
T-Endo Must	1	43	6
T-Endo Must	1	46	7
T-Endo Must	1	36	5
T-Endo Must	1	23	1
T-Endo Must	1	16	7
T-Endo Must	1	6	2
T-Endo Must	1	33	3
T-Endo Must	1	37	0
T-Endo Must	2	13	7
T-Endo Must	1	48	6
T-Endo Must	1	35	4
T-Endo Must	1	33	4
T-Endo Must	1	36	4
T-Endo Must	1	45	2
T-Endo Must	1	46	6
T-Endo Must	1	36	2
T-Endo Must	1	28	4
T-Endo Must	1	29	3
T-Endo Must	1	21	4
T-Endo Must	1	33	5
Trunatomy	1	18	0
Trunatomy	1	8	6
Trunatomy	0	57	0
Trunatomy	1	17	0
Trunatomy	1	11	9
Trunatomy	1	18	1
Trunatomy	1	10	2
Trunatomy	1	5	6
Trunatomy	1	0	4
Trunatomy	1	12	9
Trunatomy	1	9	9
Trunatomy	1	12	2
Trunatomy	1	11	1
Trunatomy	1	1	1
Trunatomy	1	1	9
Trunatomy	1	7	1
Trunatomy	0	58	4
Trunatomy	1	8	0
Trunatomy	1	2	9
Trunatomy	1	3	6
Trunatomy	1	5	0
Trunatomy	1	2	0

## Sheet: veri 2
	A			B			A+B			Inner surface											Outer Surface
File	Apical	Middle	Coronal	Apical	Middle	Coronal	Apical	Middle	Coronal	A1	A2	A3	A4	A5	A6	A7	A8	A9	A10	A11	B1	B2	B3	B4	B5	B6	B7	B8	B9	B10	B11	A+B1	A+B2	A+B3	A+B4	A+B5	A+B6	A+B7	A+B8	A+B9	A+B10	A+B11
TE	0.1725	0.135	0.636667	0.045	0.1	0.11	0.09	0.2	0.22	0.18	0.16	0.17	0.18	0.16	0.15	0.12	0.11	0.11	0.9	0.9	0	0.04	0.05	0.09	0.09	0.08	0.11	0.12	0.12	0.11	0.1	0.18	0.2	0.22	0.27	0.25	0.23	0.23	0.23	0.23	1.01	1
TE	0.1475	0.13	0.09	0.085	0.11	0.12	0.17	0.22	0.24	0.11	0.13	0.18	0.17	0.16	0.14	0.11	0.11	0.1	0.09	0.08	0.07	0.07	0.1	0.1	0.1	0.1	0.12	0.12	0.13	0.12	0.11	0.18	0.2	0.28	0.27	0.26	0.24	0.23	0.23	0.23	0.21	0.19
TE	0.1625	0.1475	0.106667	0.0675	0.0925	0.12	0.135	0.185	0.24	0.17	0.15	0.15	0.18	0.18	0.17	0.13	0.11	0.11	0.11	0.1	0.05	0.06	0.08	0.08	0.08	0.07	0.1	0.12	0.13	0.12	0.11	0.22	0.21	0.23	0.26	0.26	0.24	0.23	0.23	0.24	0.23	0.21
TE	0.225	0.16	0.11	0.1	0.16	0.16	0.2	0.32	0.32	0.22	0.22	0.23	0.23	0.2	0.18	0.14	0.12	0.12	0.11	0.1	0.07	0.11	0.11	0.11	0.12	0.14	0.19	0.19	0.18	0.16	0.14	0.29	0.33	0.34	0.34	0.32	0.32	0.33	0.31	0.3	0.27	0.24
TE	0.1875	0.1325	0.09	0.0525	0.1125	0.13	0.105	0.225	0.26	0.19	0.18	0.2	0.18	0.17	0.14	0.12	0.1	0.1	0.09	0.08	0.02	0.04	0.06	0.09	0.09	0.1	0.13	0.13	0.14	0.13	0.12	0.21	0.22	0.26	0.27	0.26	0.24	0.25	0.23	0.24	0.22	0.2
TE	0.175	0.16	0.116667	0.0775	0.095	0.12	0.155	0.19	0.24	0.17	0.16	0.17	0.2	0.18	0.17	0.15	0.14	0.13	0.12	0.1	0.07	0.09	0.07	0.08	0.08	0.08	0.1	0.12	0.13	0.12	0.11	0.24	0.25	0.24	0.28	0.26	0.25	0.25	0.26	0.26	0.24	0.21
TE	0.225	0.1575	0.103333	0.05	0.1	0.11	0.1	0.2	0.22	0.2	0.24	0.23	0.23	0.2	0.18	0.13	0.12	0.11	0.11	0.09	0.04	0.04	0.05	0.07	0.08	0.09	0.11	0.12	0.13	0.11	0.09	0.24	0.28	0.28	0.3	0.28	0.27	0.24	0.24	0.24	0.22	0.18
TE	0.1875	0.145	0.106667	0.0425	0.0875	0.106667	0.085	0.175	0.213333	0.16	0.19	0.2	0.2	0.17	0.16	0.13	0.12	0.12	0.11	0.09	0.02	0.04	0.04	0.07	0.07	0.08	0.1	0.1	0.11	0.11	0.1	0.18	0.23	0.24	0.27	0.24	0.24	0.23	0.22	0.23	0.22	0.19
TE	0.2075	0.15	0.106667	0.05	0.09	0.1	0.1	0.18	0.2	0.2	0.2	0.21	0.22	0.19	0.16	0.13	0.12	0.12	0.1	0.1	0.07	0.05	0.04	0.04	0.06	0.08	0.11	0.11	0.11	0.1	0.09	0.27	0.25	0.25	0.26	0.25	0.24	0.24	0.23	0.23	0.2	0.19
TE	0.1175	0.1275	0.1	0.1375	0.1325	0.106667	0.275	0.265	0.213333	0.1	0.12	0.12	0.13	0.14	0.14	0.12	0.11	0.11	0.1	0.09	0.12	0.12	0.16	0.15	0.13	0.13	0.14	0.13	0.13	0.1	0.09	0.22	0.24	0.28	0.28	0.27	0.27	0.26	0.24	0.24	0.2	0.18
TE	0.195	0.1575	0.113333	0.0825	0.105	0.11	0.165	0.21	0.22	0.18	0.19	0.19	0.22	0.21	0.16	0.14	0.12	0.13	0.11	0.1	0.09	0.09	0.08	0.07	0.09	0.09	0.12	0.12	0.12	0.11	0.1	0.27	0.28	0.27	0.29	0.3	0.25	0.26	0.24	0.25	0.22	0.2
TE	0.2075	0.145	0.103333	0.05	0.0875	0.106667	0.1	0.175	0.213333	0.2	0.2	0.21	0.22	0.17	0.15	0.14	0.12	0.12	0.1	0.09	0.04	0.04	0.06	0.06	0.08	0.08	0.09	0.1	0.11	0.11	0.1	0.24	0.24	0.27	0.28	0.25	0.23	0.23	0.22	0.23	0.21	0.19
TE	0.19	0.16	0.113333	0.055	0.1	0.106667	0.11	0.2	0.213333	0.18	0.19	0.2	0.19	0.2	0.18	0.13	0.13	0.12	0.11	0.11	0.04	0.04	0.06	0.08	0.08	0.08	0.11	0.13	0.12	0.11	0.09	0.22	0.23	0.26	0.27	0.28	0.26	0.24	0.26	0.24	0.22	0.2
TE	0.145	0.1425	0.11	0.055	0.09	0.0966667	0.11	0.18	0.193333	0.12	0.15	0.15	0.16	0.16	0.15	0.13	0.13	0.13	0.11	0.09	0.04	0.05	0.06	0.07	0.07	0.09	0.1	0.1	0.1	0.1	0.09	0.16	0.2	0.21	0.23	0.23	0.24	0.23	0.23	0.23	0.21	0.18
TE	0.1525	0.145	0.106667	0.0625	0.1025	0.12	0.125	0.205	0.24	0.14	0.15	0.16	0.16	0.17	0.15	0.13	0.13	0.12	0.11	0.09	0.03	0.04	0.08	0.1	0.08	0.09	0.12	0.12	0.13	0.12	0.11	0.17	0.19	0.24	0.26	0.25	0.24	0.25	0.25	0.25	0.23	0.2
TE	0.1625	0.1375	0.1	0.0625	0.0975	0.116667	0.125	0.195	0.233333	0.15	0.16	0.16	0.18	0.16	0.15	0.12	0.12	0.12	0.1	0.08	0.06	0.06	0.05	0.08	0.08	0.08	0.11	0.12	0.12	0.12	0.11	0.21	0.22	0.21	0.26	0.24	0.23	0.23	0.24	0.24	0.22	0.19
TE	0.16	0.145	0.0966667	0.0575	0.095	0.11	0.115	0.19	0.22	0.13	0.16	0.17	0.18	0.19	0.15	0.12	0.12	0.11	0.1	0.08	0.04	0.07	0.06	0.06	0.08	0.08	0.11	0.11	0.12	0.11	0.1	0.17	0.23	0.23	0.24	0.27	0.23	0.23	0.23	0.23	0.21	0.18
TE	0.21	0.16	0.11	0.0575	0.1125	0.12	0.115	0.225	0.24	0.19	0.2	0.21	0.24	0.2	0.17	0.14	0.13	0.13	0.11	0.09	0.04	0.08	0.06	0.05	0.09	0.12	0.12	0.12	0.13	0.12	0.11	0.23	0.28	0.27	0.29	0.29	0.29	0.26	0.25	0.26	0.23	0.2
TE	0.17	0.155	0.103333	0.08	0.0925	0.103333	0.16	0.185	0.206667	0.15	0.16	0.18	0.19	0.19	0.17	0.13	0.13	0.12	0.1	0.09	0.06	0.08	0.09	0.09	0.07	0.09	0.1	0.11	0.12	0.09	0.1	0.21	0.24	0.27	0.28	0.26	0.26	0.23	0.24	0.24	0.19	0.19
TE	0.185	0.17	0.1	0.055	0.09	0.11	0.11	0.18	0.22	0.15	0.16	0.23	0.2	0.21	0.17	0.16	0.14	0.11	0.1	0.09	0.04	0.05	0.07	0.06	0.06	0.08	0.1	0.12	0.12	0.11	0.1	0.19	0.21	0.3	0.26	0.27	0.25	0.26	0.26	0.23	0.21	0.19
TE	0.16	0.15	0.1	0.04	0.08	0.0933333	0.08	0.16	0.186667	0.14	0.15	0.17	0.18	0.18	0.16	0.13	0.13	0.11	0.1	0.09	0.01	0.03	0.05	0.07	0.06	0.07	0.09	0.1	0.1	0.1	0.08	0.15	0.18	0.22	0.25	0.24	0.23	0.22	0.23	0.21	0.2	0.17
TE	0.1575	0.135	0.11	0.1025	0.1475	0.133333	0.205	0.295	0.266667	0.15	0.16	0.16	0.16	0.16	0.15	0.12	0.11	0.12	0.11	0.1	0.07	0.1	0.11	0.13	0.13	0.14	0.16	0.16	0.15	0.13	0.12	0.22	0.26	0.27	0.29	0.29	0.29	0.28	0.27	0.27	0.24	0.22
W	0.14	0.1875	0.116667	0.12	0.115	0.143333	0.24	0.23	0.286667	0.12	0.11	0.13	0.2	0.22	0.22	0.17	0.14	0.12	0.12	0.11	0.11	0.13	0.13	0.11	0.1	0.09	0.12	0.15	0.14	0.16	0.13	0.23	0.24	0.26	0.31	0.32	0.31	0.29	0.29	0.26	0.28	0.24
W	0.1475	0.155	0.113333	0.0825	0.095	0.123333	0.165	0.19	0.246667	0.11	0.12	0.17	0.19	0.2	0.17	0.14	0.11	0.11	0.09	0.14	0.09	0.11	0.06	0.07	0.07	0.07	0.12	0.12	0.13	0.12	0.12	0.2	0.23	0.23	0.26	0.27	0.24	0.26	0.23	0.24	0.21	0.26
W	0.175	0.18	0.1	0.11	0.135	0.15	0.22	0.27	0.3	0.15	0.15	0.17	0.23	0.24	0.21	0.15	0.12	0.11	0.1	0.09	0.09	0.12	0.12	0.11	0.1	0.12	0.15	0.17	0.15	0.16	0.14	0.24	0.27	0.29	0.34	0.34	0.33	0.3	0.29	0.26	0.26	0.23
W	0.175	0.195	0.126667	0.0975	0.1075	0.143333	0.195	0.215	0.286667	0.14	0.14	0.19	0.23	0.25	0.21	0.18	0.14	0.14	0.12	0.12	0.1	0.11	0.09	0.09	0.07	0.09	0.13	0.14	0.15	0.14	0.14	0.24	0.25	0.28	0.32	0.32	0.3	0.31	0.28	0.29	0.26	0.26
W	0.1325	0.1425	0.0933333	0.0725	0.0975	0.126667	0.145	0.195	0.253333	0.11	0.11	0.14	0.17	0.19	0.16	0.12	0.1	0.1	0.09	0.09	0.06	0.09	0.08	0.06	0.05	0.08	0.13	0.13	0.14	0.12	0.12	0.17	0.2	0.22	0.23	0.24	0.24	0.25	0.23	0.24	0.21	0.21
W	0.125	0.1625	0.116667	0.09	0.1	0.126667	0.18	0.2	0.253333	0.11	0.1	0.14	0.15	0.18	0.18	0.14	0.15	0.12	0.13	0.1	0.09	0.11	0.12	0.04	0.1	0.08	0.11	0.11	0.13	0.13	0.12	0.2	0.21	0.26	0.19	0.28	0.26	0.25	0.26	0.25	0.26	0.22
W	0.15	0.195	0.11	0.1025	0.1075	0.14	0.205	0.215	0.28	0.11	0.14	0.15	0.2	0.24	0.22	0.18	0.14	0.13	0.1	0.1	0.1	0.11	0.1	0.1	0.08	0.09	0.11	0.15	0.15	0.14	0.13	0.21	0.25	0.25	0.3	0.32	0.31	0.29	0.29	0.28	0.24	0.23
W	0.215	0.2125	0.123333	0.0575	0.0775	0.12	0.115	0.155	0.24	0.17	0.21	0.23	0.25	0.27	0.23	0.2	0.15	0.14	0.12	0.11	0.05	0.06	0.06	0.06	0.05	0.05	0.09	0.12	0.12	0.12	0.12	0.22	0.27	0.29	0.31	0.32	0.28	0.29	0.27	0.26	0.24	0.23
W	0.1325	0.1725	0.103333	0.0625	0.0875	0.13	0.125	0.175	0.26	0.1	0.12	0.14	0.17	0.21	0.19	0.15	0.14	0.1	0.11	0.1	0.04	0.07	0.08	0.06	0.07	0.06	0.09	0.13	0.14	0.13	0.12	0.14	0.19	0.22	0.23	0.28	0.25	0.24	0.27	0.24	0.24	0.22
W	0.1475	0.17	0.0966667	0.1075	0.0975	0.14	0.215	0.195	0.28	0.12	0.12	0.15	0.2	0.21	0.2	0.15	0.12	0.11	0.1	0.08	0.09	0.13	0.12	0.09	0.08	0.08	0.1	0.13	0.13	0.15	0.14	0.21	0.25	0.27	0.29	0.29	0.28	0.25	0.25	0.24	0.25	0.22
W	0.1775	0.175	0.0966667	0.1075	0.115	0.136667	0.215	0.23	0.273333	0.15	0.16	0.17	0.23	0.22	0.2	0.15	0.13	0.11	0.1	0.08	0.1	0.12	0.11	0.1	0.08	0.1	0.13	0.15	0.14	0.15	0.12	0.25	0.28	0.28	0.33	0.3	0.3	0.28	0.28	0.25	0.25	0.2
W	0.165	0.2025	0.126667	0.175	0.12	0.153333	0.35	0.24	0.306667	0.12	0.14	0.18	0.22	0.27	0.22	0.18	0.14	0.14	0.12	0.12	0.18	0.2	0.19	0.13	0.1	0.09	0.14	0.15	0.16	0.15	0.15	0.3	0.34	0.37	0.35	0.37	0.31	0.32	0.29	0.3	0.27	0.27
W	0.17	0.195	0.11	0.1025	0.0975	0.133333	0.205	0.195	0.266667	0.13	0.15	0.17	0.23	0.24	0.23	0.17	0.14	0.12	0.11	0.1	0.1	0.12	0.11	0.08	0.07	0.07	0.11	0.14	0.14	0.14	0.12	0.23	0.27	0.28	0.31	0.31	0.3	0.28	0.28	0.26	0.25	0.22
W	0.2175	0.2075	0.113333	0.1075	0.14	0.16	0.215	0.28	0.32	0.16	0.2	0.23	0.28	0.27	0.23	0.18	0.15	0.13	0.11	0.1	0.11	0.12	0.1	0.1	0.1	0.12	0.16	0.18	0.17	0.16	0.15	0.27	0.32	0.33	0.38	0.37	0.35	0.34	0.33	0.3	0.27	0.25
W	0.09	0.19	0.133333	0.16	0.105	0.12	0.32	0.21	0.24	0.05	0.05	0.1	0.16	0.21	0.21	0.18	0.16	0.14	0.14	0.12	0.18	0.18	0.16	0.12	0.1	0.08	0.1	0.14	0.12	0.13	0.11	0.23	0.23	0.26	0.28	0.31	0.29	0.28	0.3	0.26	0.27	0.23
W	0.1325	0.1975	0.113333	0.1325	0.0925	0.14	0.265	0.185	0.28	0.11	0.11	0.12	0.19	0.24	0.22	0.19	0.14	0.13	0.11	0.1	0.13	0.14	0.15	0.11	0.06	0.07	0.11	0.13	0.14	0.14	0.14	0.24	0.25	0.27	0.3	0.3	0.29	0.3	0.27	0.27	0.25	0.24
W	0.1675	0.185	0.11	0.1075	0.1275	0.16	0.215	0.255	0.32	0.13	0.15	0.17	0.22	0.24	0.21	0.16	0.13	0.12	0.11	0.1	0.1	0.12	0.11	0.1	0.08	0.12	0.14	0.17	0.16	0.16	0.16	0.23	0.27	0.28	0.32	0.32	0.33	0.3	0.3	0.28	0.27	0.26
W	0.155	0.185	0.113333	0.07	0.09	0.13	0.14	0.18	0.26	0.12	0.13	0.17	0.2	0.23	0.21	0.16	0.14	0.12	0.11	0.11	0.07	0.07	0.07	0.07	0.06	0.06	0.1	0.14	0.13	0.14	0.12	0.19	0.2	0.24	0.27	0.29	0.27	0.26	0.28	0.25	0.25	0.23
W	0.1575	0.1775	0.113333	0.0625	0.085	0.123333	0.125	0.17	0.246667	0.12	0.14	0.16	0.21	0.22	0.19	0.16	0.14	0.12	0.12	0.1	0.06	0.07	0.07	0.05	0.05	0.06	0.09	0.14	0.13	0.13	0.11	0.18	0.21	0.23	0.26	0.27	0.25	0.25	0.28	0.25	0.25	0.21
W	0.165	0.17	0.11	0.0825	0.1075	0.126667	0.165	0.215	0.253333	0.15	0.13	0.18	0.2	0.2	0.19	0.15	0.14	0.12	0.11	0.1	0.08	0.09	0.09	0.07	0.09	0.08	0.13	0.13	0.13	0.13	0.12	0.23	0.22	0.27	0.27	0.29	0.27	0.28	0.27	0.25	0.24	0.22
W	0.1775	0.1825	0.11	0.12	0.125	0.153333	0.24	0.25	0.306667	0.14	0.15	0.19	0.23	0.24	0.2	0.17	0.12	0.13	0.1	0.1	0.1	0.14	0.12	0.12	0.09	0.12	0.14	0.15	0.16	0.15	0.15	0.24	0.29	0.31	0.35	0.33	0.32	0.31	0.27	0.29	0.25	0.25
W	0.1525	0.1825	0.116667	0.1375	0.135	0.163333	0.275	0.27	0.326667	0.12	0.13	0.15	0.21	0.23	0.21	0.16	0.13	0.13	0.11	0.11	0.12	0.16	0.15	0.12	0.1	0.11	0.16	0.17	0.17	0.16	0.16	0.24	0.29	0.3	0.33	0.33	0.32	0.32	0.3	0.3	0.27	0.27
TR	0.1475	0.1275	0.0966667	0.025	0.0325	0.0666667	0.05	0.065	0.133333	0.14	0.15	0.15	0.15	0.15	0.14	0.12	0.1	0.1	0.1	0.09	0.03	0.02	0.03	0.02	0.01	0.02	0.04	0.06	0.06	0.07	0.07	0.17	0.17	0.18	0.17	0.16	0.16	0.16	0.16	0.16	0.17	0.16
TR	0.19	0.13	0.0933333	0.0175	0.05	0.0766667	0.035	0.1	0.153333	0.19	0.18	0.21	0.18	0.16	0.14	0.12	0.1	0.1	0.1	0.08	0.01	0.02	0.02	0.02	0.03	0.04	0.06	0.07	0.08	0.08	0.07	0.2	0.2	0.23	0.2	0.19	0.18	0.18	0.17	0.18	0.18	0.15
TR	0.165	0.1325	0.09	0.015	0.04	0.08	0.03	0.08	0.16	0.17	0.17	0.16	0.16	0.15	0.15	0.12	0.11	0.1	0.09	0.08	0.02	0.02	0.01	0.01	0.01	0.02	0.06	0.07	0.09	0.08	0.07	0.19	0.19	0.17	0.17	0.16	0.17	0.18	0.18	0.19	0.17	0.15
TR	0.1475	0.11	0.09	0	0.0375	0.0733333	0	0.075	0.146667	0.16	0.15	0.14	0.14	0.13	0.12	0.1	0.09	0.1	0.09	0.08	-0.01	-0.01	0.01	0.01	0.01	0.01	0.06	0.07	0.07	0.08	0.07	0.15	0.14	0.15	0.15	0.14	0.13	0.16	0.16	0.17	0.17	0.15
TR	0.1275	0.1425	0.103333	0.0275	0.035	0.07	0.055	0.07	0.14	0.11	0.09	0.16	0.15	0.16	0.15	0.13	0.13	0.11	0.11	0.09	0.01	0.03	0.04	0.03	0	0.02	0.05	0.07	0.07	0.08	0.06	0.12	0.12	0.2	0.18	0.16	0.17	0.18	0.2	0.18	0.19	0.15
TR	0.16	0.13	0.1	-0.01	0.02	0.0633333	-0.02	0.04	0.126667	0.17	0.18	0.15	0.14	0.14	0.15	0.13	0.1	0.1	0.1	0.1	-0.01	-0.03	-0.01	0.01	0	0	0.03	0.05	0.06	0.07	0.06	0.16	0.15	0.14	0.15	0.14	0.15	0.16	0.15	0.16	0.17	0.16
TR	0.14	0.3125	0.08	0.0125	0.0525	0.0766667	0.025	0.105	0.153333	0.14	0.14	0.14	0.14	0.13	0.12	0.1	0.9	0.08	0.08	0.08	0	0.01	0.02	0.02	0.03	0.04	0.06	0.08	0.08	0.08	0.07	0.14	0.15	0.16	0.16	0.16	0.16	0.16	0.98	0.16	0.16	0.15
TR	0.12	0.08	0.0666667	0.0375	0.0825	0.12	0.075	0.165	0.24	0.14	0.12	0.11	0.11	0.1	0.09	0.07	0.06	0.07	0.07	0.06	0.02	0.03	0.04	0.06	0.07	0.07	0.09	0.1	0.17	0.1	0.09	0.16	0.15	0.15	0.17	0.17	0.16	0.16	0.16	0.24	0.17	0.15
TR	0.1325	0.125	0.0833333	0.0325	0.0525	0.0766667	0.065	0.105	0.153333	0.13	0.14	0.13	0.13	0.14	0.14	0.12	0.1	0.09	0.08	0.08	0.03	0.03	0.03	0.04	0.04	0.04	0.06	0.07	0.08	0.08	0.07	0.16	0.17	0.16	0.17	0.18	0.18	0.18	0.17	0.17	0.16	0.15
TR	0.1125	0.095	0.07	0.06	0.07	0.0866667	0.12	0.14	0.173333	0.12	0.11	0.11	0.11	0.11	0.11	0.08	0.08	0.07	0.07	0.07	0.06	0.06	0.06	0.06	0.06	0.06	0.08	0.08	0.09	0.09	0.08	0.18	0.17	0.17	0.17	0.17	0.17	0.16	0.16	0.16	0.16	0.15
TR	0.145	0.12	0.0866667	0.0275	0.05	0.0733333	0.055	0.1	0.146667	0.14	0.14	0.15	0.15	0.14	0.13	0.11	0.1	0.09	0.09	0.08	0.01	0.03	0.04	0.03	0.03	0.04	0.06	0.07	0.08	0.07	0.07	0.15	0.17	0.19	0.18	0.17	0.17	0.17	0.17	0.17	0.16	0.15
TR	0.1525	0.1175	0.0966667	0.0075	0.04	0.0666667	0.015	0.08	0.133333	0.15	0.15	0.15	0.16	0.15	0.12	0.1	0.1	0.1	0.1	0.09	0.01	0.01	0	0.01	0.02	0.03	0.05	0.06	0.06	0.07	0.07	0.16	0.16	0.15	0.17	0.17	0.15	0.15	0.16	0.16	0.17	0.16
TR	0.1425	0.1175	0.0833333	0.0325	0.055	0.0833333	0.065	0.11	0.166667	0.14	0.15	0.14	0.14	0.15	0.12	0.11	0.09	0.09	0.09	0.07	0.01	0.03	0.04	0.05	0.04	0.05	0.07	0.06	0.08	0.09	0.08	0.15	0.18	0.18	0.19	0.19	0.17	0.18	0.15	0.17	0.18	0.15
TR	0.1775	0.1325	0.0933333	0.0125	0.05	0.0733333	0.025	0.1	0.146667	0.17	0.16	0.19	0.19	0.16	0.15	0.12	0.1	0.1	0.09	0.09	0.02	0.01	0	0.02	0.04	0.04	0.06	0.06	0.07	0.08	0.07	0.19	0.17	0.19	0.21	0.2	0.19	0.18	0.16	0.17	0.17	0.16
TR	0.16	0.1275	0.09	0.005	0.0475	0.0633333	0.01	0.095	0.126667	0.16	0.16	0.16	0.16	0.15	0.14	0.12	0.1	0.1	0.09	0.08	0.01	-0.02	0.01	0.02	0.03	0.03	0.06	0.07	0.06	0.07	0.06	0.17	0.14	0.17	0.18	0.18	0.17	0.18	0.17	0.16	0.16	0.14
TR	0.155	0.1375	0.0966667	0.0125	0.04	0.0666667	0.025	0.08	0.133333	0.15	0.16	0.15	0.16	0.16	0.15	0.13	0.11	0.1	0.1	0.09	0.02	0	0.02	0.01	0.03	0.03	0.04	0.06	0.06	0.07	0.07	0.17	0.16	0.17	0.17	0.19	0.18	0.17	0.17	0.16	0.17	0.16
TR	0.1725	0.13	0.0833333	0.0325	0.08	0.08	0.065	0.16	0.16	0.18	0.16	0.17	0.18	0.16	0.14	0.12	0.1	0.09	0.08	0.08	0.03	0.03	0.03	0.04	0.06	0.07	0.09	0.1	0.09	0.08	0.07	0.21	0.19	0.2	0.22	0.22	0.21	0.21	0.2	0.18	0.16	0.15
TR	0.145	0.1125	0.0833333	0.005	0.04	0.0766667	0.01	0.08	0.153333	0.15	0.14	0.15	0.14	0.13	0.13	0.1	0.09	0.08	0.07	0.1	-0.01	0.01	0.01	0.01	0.02	0.03	0.05	0.06	0.07	0.08	0.08	0.14	0.15	0.16	0.15	0.15	0.16	0.15	0.15	0.15	0.15	0.18
TR	0.125	0.09	0.0666667	0.0275	0.0625	0.0733333	0.055	0.125	0.146667	0.13	0.13	0.12	0.12	0.11	0.1	0.08	0.07	0.06	0.07	0.07	0.02	0.03	0.02	0.04	0.05	0.05	0.07	0.08	0.07	0.07	0.08	0.15	0.16	0.14	0.16	0.16	0.15	0.15	0.15	0.13	0.14	0.15
TR	0.1425	0.1075	0.0766667	0.035	0.06	0.08	0.07	0.12	0.16	0.14	0.15	0.14	0.14	0.14	0.12	0.09	0.08	0.08	0.08	0.07	0.03	0.02	0.05	0.04	0.05	0.05	0.07	0.07	0.08	0.08	0.08	0.17	0.17	0.19	0.18	0.19	0.17	0.16	0.15	0.16	0.16	0.15
TR	0.17	0.1275	0.09	0.0375	0.05	0.08	0.075	0.1	0.16	0.18	0.17	0.17	0.16	0.16	0.14	0.12	0.09	0.09	0.1	0.08	0	0.1	0.02	0.03	0.04	0.03	0.06	0.07	0.08	0.08	0.08	0.18	0.27	0.19	0.19	0.2	0.17	0.18	0.16	0.17	0.18	0.16
TR	0.08	0.07	0.0533333	0.055	0.085	0.0966667	0.11	0.17	0.193333	0.09	0.07	0.08	0.08	0.09	0.08	0.06	0.05	0.05	0.06	0.05	0.06	0.03	0.06	0.07	0.07	0.08	0.09	0.1	0.1	0.09	0.1	0.15	0.1	0.14	0.15	0.16	0.16	0.15	0.15	0.15	0.15	0.15
			Tablo 2. Tanımlayıcı istatistikler
				TE			W			TR
			Nokta	İç	Dış	Toplam	İç	Dış	Toplam	İç	Dış	Toplam
			1
			2
			3
			4
			5
			6
			7
			8
			9
			10
			11

## Sheet: veri 3
Outside-Inside (B-A) values												Region
	B-A1	B-A2	B-A3	B-A4	B-A5	B-A6	B-A7	B-A8	B-A9	B-A10	B-A11	Apical	Middle	Coronal
TE	-0.0688889	-0.12	-0.12	-0.09	-0.07	-0.07	-0.01	0.01	0.01	-0.79	-0.8	-0.0997222	-0.035	-0.526667
TE	0.617273	-0.06	-0.08	-0.07	-0.06	-0.04	0.01	0.01	0.03	0.03	0.03	0.101818	-0.02	0.03
TE	0.739091	-0.09	-0.07	-0.1	-0.1	-0.1	-0.03	0.01	0.02	0.01	0.01	0.119773	-0.055	0.0133333
TE	0.494286	-0.11	-0.12	-0.12	-0.08	-0.04	0.05	0.07	0.06	0.05	0.04	0.0360714	0	0.05
TE	0.476667	-0.14	-0.14	-0.09	-0.08	-0.04	0.01	0.03	0.04	0.04	0.04	0.0266667	-0.02	0.04
TE	0.739091	-0.07	-0.1	-0.12	-0.1	-0.09	-0.05	-0.02	0	0	0.01	0.112273	-0.065	0.00333333
TE	0.8	-0.2	-0.18	-0.16	-0.12	-0.09	-0.02	0	0.02	0	0	0.065	-0.0575	0.00666667
TE	0.74	-0.15	-0.16	-0.13	-0.1	-0.08	-0.03	-0.02	-0.01	0	0.01	0.075	-0.0575	4.62593e-18
TE	0.7	-0.15	-0.17	-0.18	-0.13	-0.08	-0.02	-0.01	-0.01	0	-0.01	0.05	-0.06	-0.00666667
TE	0.9	0	0.04	0.02	-0.01	-0.01	0.02	0.02	0.02	0	0	0.24	0.005	0.00666667
TE	0.82	-0.1	-0.11	-0.15	-0.12	-0.07	-0.02	0	-0.01	0	0	0.115	-0.0525	-0.00333333
TE	0.7	-0.16	-0.15	-0.16	-0.09	-0.07	-0.05	-0.02	-0.01	0.01	0.01	0.0575	-0.0575	0.00333333
TE	0.638182	-0.15	-0.14	-0.11	-0.12	-0.1	-0.02	0	0	0	-0.02	0.0595455	-0.06	-0.00666667
TE	0.88	-0.1	-0.09	-0.09	-0.09	-0.06	-0.03	-0.03	-0.03	-0.01	0	0.15	-0.0525	-0.0133333
TE	0.678182	-0.11	-0.08	-0.06	-0.09	-0.06	-0.01	-0.01	0.01	0.01	0.02	0.107045	-0.0425	0.0133333
TE	0.577273	-0.1	-0.11	-0.1	-0.08	-0.07	-0.01	0	0	0.02	0.03	0.0668182	-0.04	0.0166667
TE	0.67	-0.09	-0.11	-0.12	-0.11	-0.07	-0.01	-0.01	0.01	0.01	0.02	0.0875	-0.05	0.0133333
TE	0.628182	-0.12	-0.15	-0.19	-0.11	-0.05	-0.02	-0.01	0	0.01	0.02	0.0420455	-0.0475	0.01
TE	0.75	-0.08	-0.09	-0.1	-0.12	-0.08	-0.03	-0.02	0	-0.01	0.01	0.12	-0.0625	0
TE	0.75	-0.11	-0.16	-0.14	-0.15	-0.09	-0.06	-0.02	0.01	0.01	0.01	0.085	-0.08	0.01
TE	0.748889	-0.12	-0.12	-0.11	-0.12	-0.09	-0.04	-0.03	-0.01	0	-0.01	0.0997222	-0.07	-0.00666667
TE	0.683333	-0.06	-0.05	-0.03	-0.03	-0.01	0.04	0.05	0.03	0.02	0.02	0.135833	0.0125	0.0233333
W	-0.01	0.02	0	-0.09	-0.12	-0.13	-0.05	0.01	0.02	0.04	0.02	-0.02	-0.0725	0.0266667
W	-0.02	-0.01	-0.11	-0.12	-0.13	-0.1	-0.02	0.01	0.02	0.03	-0.02	-0.065	-0.06	0.01
W	-0.06	-0.03	-0.05	-0.12	-0.14	-0.09	0	0.05	0.04	0.06	0.05	-0.065	-0.045	0.05
W	-0.04	-0.03	-0.1	-0.14	-0.18	-0.12	-0.05	0	0.01	0.02	0.02	-0.0775	-0.0875	0.0166667
W	-0.05	-0.02	-0.06	-0.11	-0.14	-0.08	0.01	0.03	0.04	0.03	0.03	-0.06	-0.045	0.0333333
W	-0.02	0.01	-0.02	-0.11	-0.08	-0.1	-0.03	-0.04	0.01	0	0.02	-0.035	-0.0625	0.01
W	-0.01	-0.03	-0.05	-0.1	-0.16	-0.13	-0.07	0.01	0.02	0.04	0.03	-0.0475	-0.0875	0.03
W	-0.12	-0.15	-0.17	-0.19	-0.22	-0.18	-0.11	-0.03	-0.02	0	0.01	-0.1575	-0.135	-0.00333333
W	-0.06	-0.05	-0.06	-0.11	-0.14	-0.13	-0.06	-0.01	0.04	0.02	0.02	-0.07	-0.085	0.0266667
W	-0.03	0.01	-0.03	-0.11	-0.13	-0.12	-0.05	0.01	0.02	0.05	0.06	-0.04	-0.0725	0.0433333
W	-0.05	-0.04	-0.06	-0.13	-0.14	-0.1	-0.02	0.02	0.03	0.05	0.04	-0.07	-0.06	0.04
W	0.06	0.06	0.01	-0.09	-0.17	-0.13	-0.04	0.01	0.02	0.03	0.03	0.01	-0.0825	0.0266667
W	-0.03	-0.03	-0.06	-0.15	-0.17	-0.16	-0.06	0	0.02	0.03	0.02	-0.0675	-0.0975	0.0233333
W	-0.05	-0.08	-0.13	-0.18	-0.17	-0.11	-0.02	0.03	0.04	0.05	0.05	-0.11	-0.0675	0.0466667
W	0.13	0.13	0.06	-0.04	-0.11	-0.13	-0.08	-0.02	-0.02	-0.01	-0.01	0.07	-0.085	-0.0133333
W	0.02	0.03	0.03	-0.08	-0.18	-0.15	-0.08	-0.01	0.01	0.03	0.04	0	-0.105	0.0266667
W	-0.03	-0.03	-0.06	-0.12	-0.16	-0.09	-0.02	0.04	0.04	0.05	0.06	-0.06	-0.0575	0.05
W	-0.05	-0.06	-0.1	-0.13	-0.17	-0.15	-0.06	0	0.01	0.03	0.01	-0.085	-0.095	0.0166667
W	-0.06	-0.07	-0.09	-0.16	-0.17	-0.13	-0.07	0	0.01	0.01	0.01	-0.095	-0.0925	0.01
W	-0.07	-0.04	-0.09	-0.13	-0.11	-0.11	-0.02	-0.01	0.01	0.02	0.02	-0.0825	-0.0625	0.0166667
W	-0.04	-0.01	-0.07	-0.11	-0.15	-0.08	-0.03	0.03	0.03	0.05	0.05	-0.0575	-0.0575	0.0433333
W	0	0.03	0	-0.09	-0.13	-0.1	0	0.04	0.04	0.05	0.05	-0.015	-0.0475	0.0466667
TR	-0.11	-0.13	-0.12	-0.13	-0.14	-0.12	-0.08	-0.04	-0.04	-0.03	-0.02	-0.1225	-0.095	-0.03
TR	-0.18	-0.16	-0.19	-0.16	-0.13	-0.1	-0.06	-0.03	-0.02	-0.02	-0.01	-0.1725	-0.08	-0.0166667
TR	-0.15	-0.15	-0.15	-0.15	-0.14	-0.13	-0.06	-0.04	-0.01	-0.01	-0.01	-0.15	-0.0925	-0.01
TR	-0.17	-0.16	-0.13	-0.13	-0.12	-0.11	-0.04	-0.02	-0.03	-0.01	-0.01	-0.1475	-0.0725	-0.0166667
TR	-0.1	-0.06	-0.12	-0.12	-0.16	-0.13	-0.08	-0.06	-0.04	-0.03	-0.03	-0.1	-0.1075	-0.0333333
TR	-0.18	-0.21	-0.16	-0.13	-0.14	-0.15	-0.1	-0.05	-0.04	-0.03	-0.04	-0.17	-0.11	-0.0366667
TR	-0.14	-0.13	-0.12	-0.12	-0.1	-0.08	-0.04	-0.82	0	0	-0.01	-0.1275	-0.26	-0.00333333
TR	-0.12	-0.09	-0.07	-0.05	-0.03	-0.02	0.02	0.04	0.1	0.03	0.03	-0.0825	0.0025	0.0533333
TR	-0.1	-0.11	-0.1	-0.09	-0.1	-0.1	-0.06	-0.03	-0.01	0	-0.01	-0.1	-0.0725	-0.00666667
TR	-0.06	-0.05	-0.05	-0.05	-0.05	-0.05	0	0	0.02	0.02	0.01	-0.0525	-0.025	0.0166667
TR	-0.13	-0.11	-0.11	-0.12	-0.11	-0.09	-0.05	-0.03	-0.01	-0.02	-0.01	-0.1175	-0.07	-0.0133333
TR	-0.14	-0.14	-0.15	-0.15	-0.13	-0.09	-0.05	-0.04	-0.04	-0.03	-0.02	-0.145	-0.0775	-0.03
TR	-0.13	-0.12	-0.1	-0.09	-0.11	-0.07	-0.04	-0.03	-0.01	0	0.01	-0.11	-0.0625	0
TR	-0.15	-0.15	-0.19	-0.17	-0.12	-0.11	-0.06	-0.04	-0.03	-0.01	-0.02	-0.165	-0.0825	-0.02
TR	-0.15	-0.18	-0.15	-0.14	-0.12	-0.11	-0.06	-0.03	-0.04	-0.02	-0.02	-0.155	-0.08	-0.0266667
TR	-0.13	-0.16	-0.13	-0.15	-0.13	-0.12	-0.09	-0.05	-0.04	-0.03	-0.02	-0.1425	-0.0975	-0.03
TR	-0.15	-0.13	-0.14	-0.14	-0.1	-0.07	-0.03	0	0	0	-0.01	-0.14	-0.05	-0.00333333
TR	-0.16	-0.13	-0.14	-0.13	-0.11	-0.1	-0.05	-0.03	-0.01	0.01	-0.02	-0.14	-0.0725	-0.00666667
TR	-0.11	-0.1	-0.1	-0.08	-0.06	-0.05	-0.01	0.01	0.01	0	0.01	-0.0975	-0.0275	0.00666667
TR	-0.11	-0.13	-0.09	-0.1	-0.09	-0.07	-0.02	-0.01	0	0	0.01	-0.1075	-0.0475	0.00333333
TR	-0.18	-0.07	-0.15	-0.13	-0.12	-0.11	-0.06	-0.02	-0.01	-0.02	0	-0.1325	-0.0775	-0.01
TR	-0.03	-0.04	-0.02	-0.01	-0.02	0	0.03	0.05	0.05	0.03	0.05	-0.025	0.015	0.0433333

## Sheet: veri 4
Less/More values												region
	B-A1	B-A2	B-A3	B-A4	B-A5	B-A6	B-A7	B-A8	B-A9	B-A10	B-A11	Apical	middle	coronal
TE	0	0.25	0.294118	0.5	0.5625	0.533333	0.916667	0.916667	0.916667	0.122222	0.111111	0.261029	0.732292	0.383333
TE	0.636364	0.538462	0.555556	0.588235	0.625	0.714286	0.916667	0.916667	0.769231	0.75	0.727273	0.579654	0.793155	0.748834
TE	0.294118	0.4	0.533333	0.444444	0.444444	0.411765	0.769231	0.916667	0.846154	0.916667	0.909091	0.417974	0.635527	0.890637
TE	0.318182	0.5	0.478261	0.478261	0.6	0.777778	0.736842	0.631579	0.666667	0.6875	0.714286	0.443676	0.68655	0.689484
TE	0.105263	0.222222	0.3	0.5	0.529412	0.714286	0.923077	0.769231	0.714286	0.692308	0.666667	0.281871	0.734001	0.691087
TE	0.411765	0.5625	0.411765	0.4	0.444444	0.470588	0.666667	0.857143	1	1	0.909091	0.446507	0.609711	0.969697
TE	0.2	0.166667	0.217391	0.304348	0.4	0.5	0.846154	1	0.846154	1	1	0.222101	0.686538	0.948718
TE	0.125	0.210526	0.2	0.35	0.411765	0.5	0.769231	0.833333	0.916667	1	0.9	0.221382	0.628582	0.938889
TE	0.35	0.25	0.190476	0.181818	0.315789	0.5	0.846154	0.916667	0.916667	1	0.9	0.243074	0.644652	0.938889
TE	0.833333	1	0.75	0.866667	0.928571	0.928571	0.857143	0.846154	0.846154	1	1	0.8625	0.89011	0.948718
TE	0.5	0.473684	0.421053	0.318182	0.428571	0.5625	0.857143	1	0.923077	1	1	0.42823	0.712054	0.974359
TE	0.2	0.2	0.285714	0.272727	0.470588	0.533333	0.642857	0.833333	0.916667	0.909091	0.9	0.23961	0.620028	0.908586
TE	0.222222	0.210526	0.3	0.421053	0.4	0.444444	0.846154	1	1	1	0.818182	0.28845	0.67265	0.939394
TE	0.333333	0.333333	0.4	0.4375	0.4375	0.6	0.769231	0.769231	0.769231	0.909091	1	0.376042	0.64399	0.892774
TE	0.214286	0.266667	0.5	0.625	0.470588	0.6	0.923077	0.923077	0.923077	0.916667	0.818182	0.401488	0.729186	0.885975
TE	0.4	0.375	0.3125	0.444444	0.5	0.533333	0.916667	1	1	0.833333	0.727273	0.382986	0.7375	0.853535
TE	0.307692	0.4375	0.352941	0.333333	0.421053	0.533333	0.916667	0.916667	0.916667	0.909091	0.8	0.357867	0.69693	0.875253
TE	0.210526	0.4	0.285714	0.208333	0.45	0.705882	0.857143	0.923077	1	0.916667	0.818182	0.276143	0.734026	0.911616
TE	0.4	0.5	0.5	0.473684	0.368421	0.529412	0.769231	0.846154	1	0.9	0.9	0.468421	0.628304	0.933333
TE	0.266667	0.3125	0.304348	0.3	0.285714	0.470588	0.625	0.857143	0.916667	0.909091	0.9	0.295879	0.559611	0.908586
TE	0.0714286	0.2	0.294118	0.388889	0.333333	0.4375	0.692308	0.769231	0.909091	1	0.888889	0.238609	0.558093	0.93266
TE	0.466667	0.625	0.6875	0.8125	0.8125	0.933333	1.33333	0.6875	0.8	0.846154	0.833333	0.647917	0.941667	0.826496
W	0.916667	0.846154	1	0.55	0.454545	0.409091	0.705882	0.933333	0.857143	0.75	0.846154	0.828205	0.625713	0.817766
W	0.818182	0.916667	0.352941	0.368421	0.35	0.411765	0.857143	0.916667	0.846154	0.75	0.857143	0.614053	0.633894	0.817766
W	0.6	0.8	0.705882	0.478261	0.416667	0.571429	1	0.705882	0.733333	0.625	0.642857	0.646036	0.673494	0.667063
W	0.714286	0.785714	0.473684	0.391304	0.28	0.428571	0.722222	1	0.933333	0.857143	0.857143	0.591247	0.607698	0.88254
W	0.545455	0.818182	0.571429	0.352941	0.263158	0.5	0.923077	0.769231	0.714286	0.75	0.75	0.572002	0.613866	0.738095
W	0.818182	0.909091	0.857143	0.266667	0.555556	0.444444	0.785714	0.733333	0.923077	1	0.833333	0.712771	0.629762	0.918803
W	0.909091	0.785714	0.666667	0.5	0.333333	0.409091	0.611111	0.933333	0.866667	0.714286	0.769231	0.715368	0.571717	0.783394
W	0.294118	0.285714	0.26087	0.24	0.185185	0.217391	0.45	0.8	0.857143	1	0.916667	0.270175	0.413144	0.924603
W	0.4	0.583333	0.571429	0.352941	0.333333	0.315789	0.6	0.928571	0.714286	0.846154	0.833333	0.476926	0.544424	0.797924
W	0.75	0.923077	0.8	0.45	0.380952	0.4	0.666667	0.923077	0.846154	0.666667	0.571429	0.730769	0.592674	0.69475
W	0.666667	0.75	0.647059	0.434783	0.363636	0.5	0.866667	0.866667	0.785714	0.666667	0.666667	0.624627	0.649242	0.706349
W	0.666667	0.7	0.947368	0.590909	0.37037	0.409091	0.777778	0.933333	0.875	0.8	0.8	0.726236	0.622643	0.825
W	0.769231	0.8	0.647059	0.347826	0.291667	0.304348	0.647059	1	0.857143	0.785714	0.833333	0.641029	0.560768	0.825397
W	0.6875	0.6	0.434783	0.357143	0.37037	0.521739	0.888889	0.833333	0.764706	0.6875	0.666667	0.519856	0.653583	0.706291
W	0.277778	0.277778	0.625	0.75	0.47619	0.380952	0.555556	0.875	0.857143	0.928571	0.916667	0.482639	0.571925	0.900794
W	0.846154	0.785714	0.8	0.578947	0.25	0.318182	0.578947	0.928571	0.928571	0.785714	0.714286	0.752704	0.518925	0.809524
W	0.769231	0.8	0.647059	0.454545	0.333333	0.571429	0.875	0.764706	0.75	0.6875	0.625	0.667709	0.636117	0.6875
W	0.583333	0.538462	0.411765	0.35	0.26087	0.285714	0.625	1	0.923077	0.785714	0.916667	0.47089	0.542896	0.875153
W	0.5	0.5	0.4375	0.238095	0.227273	0.315789	0.5625	1	0.923077	0.923077	0.909091	0.418899	0.526391	0.918415
W	0.533333	0.692308	0.5	0.35	0.45	0.421053	0.866667	0.928571	0.923077	0.846154	0.833333	0.51891	0.666573	0.867521
W	0.714286	0.933333	0.631579	0.521739	0.375	0.6	0.823529	0.8	0.8125	0.666667	0.666667	0.700234	0.649632	0.715278
W	1	0.8125	1	0.571429	0.434783	0.52381	1	0.764706	0.764706	0.6875	0.6875	0.845982	0.680825	0.713235
TR	0.214286	0.133333	0.2	0.133333	0.0666667	0.142857	0.333333	0.6	0.6	0.7	0.777778	0.170238	0.285714	0.692593
TR	0.0526316	0.111111	0.0952381	0.111111	0.1875	0.285714	0.5	0.7	0.8	0.8	0.875	0.092523	0.418304	0.825
TR	0.117647	0.117647	0.0625	0.0625	0.0666667	0.133333	0.5	0.636364	0.9	0.888889	0.875	0.0900735	0.334091	0.887963
TR	-0.0625	-0.0666667	0.0714286	0.0714286	0.0769231	0.0833333	0.6	0.777778	0.7	0.888889	0.875	0.00342262	0.384509	0.821296
TR	0.0909091	0.333333	0.25	0.2	0	0.133333	0.384615	0.538462	0.636364	0.727273	0.666667	0.218561	0.264103	0.676768
TR	-0.0588235	-0.166667	-0.0666667	0.0714286	0	0	0.230769	0.5	0.6	0.7	0.6	-0.0551821	0.182692	0.633333
TR	0	0.0714286	0.142857	0.142857	0.230769	0.333333	0.6	0.0888889	1	1	0.875	0.0892857	0.313248	0.958333
TR	0.142857	0.25	0.363636	0.545455	0.7	0.777778	0.777778	0.6	0.411765	0.7	0.666667	0.325487	0.713889	0.59281
TR	0.230769	0.214286	0.230769	0.307692	0.285714	0.285714	0.5	0.7	0.888889	1	0.875	0.245879	0.442857	0.921296
TR	0.5	0.545455	0.545455	0.545455	0.545455	0.545455	1	1	0.777778	0.777778	0.875	0.534091	0.772727	0.810185
TR	0.0714286	0.214286	0.266667	0.2	0.214286	0.307692	0.545455	0.7	0.888889	0.777778	0.875	0.188095	0.441858	0.847222
TR	0.0666667	0.0666667	0	0.0625	0.133333	0.25	0.5	0.6	0.6	0.7	0.777778	0.0489583	0.370833	0.692593
TR	0.0714286	0.2	0.285714	0.357143	0.266667	0.416667	0.636364	0.666667	0.888889	1	0.875	0.228571	0.496591	0.921296
TR	0.117647	0.0625	0	0.105263	0.25	0.266667	0.5	0.6	0.7	0.888889	0.777778	0.0713526	0.404167	0.788889
TR	0.0625	-0.125	0.0625	0.125	0.2	0.214286	0.5	0.7	0.6	0.777778	0.75	0.03125	0.403571	0.709259
TR	0.133333	0	0.133333	0.0625	0.1875	0.2	0.307692	0.545455	0.6	0.7	0.777778	0.0822917	0.310162	0.692593
TR	0.166667	0.1875	0.176471	0.222222	0.375	0.5	0.75	1	1	1	0.875	0.188215	0.65625	0.958333
TR	-0.0666667	0.0714286	0.0666667	0.0714286	0.153846	0.230769	0.5	0.666667	0.875	0.875	0.8	0.0357143	0.387821	0.85
TR	0.153846	0.230769	0.166667	0.333333	0.454545	0.5	0.875	0.875	1	1	0.875	0.221154	0.676136	0.958333
TR	0.214286	0.133333	0.357143	0.285714	0.357143	0.416667	0.777778	0.875	1	1	0.875	0.247619	0.606647	0.958333
TR	0	0.588235	0.117647	0.1875	0.25	0.214286	0.5	0.777778	0.888889	0.8	1	0.223346	0.435516	0.896296
TR	0.666667	0.428571	0.75	0.875	0.777778	1	0.666667	0.5	0.5	0.666667	0.5	0.68006	0.736111	0.555556
