# Supplementary material for: Evaluation of shaping ability, apical transportation and centering ratio of T-Endo Must, WaveOne Gold, and Trunatomy in resin blocks
Source: PeerJ. 2024 Oct 14;12:e18088. doi: 10.7717/peerj.18088 (PMC11485059; doi:10.7717/peerj.18088)
Supplement: Supplemental Information 2 [file peerj-12-18088-s002.xlsx]

## Sheet: 1
Case Summaries	Case Summaries	Case Summaries	Case Summaries	Case Summaries	Case Summaries
Time	Time	Time	Time	Time	Time
Files	Mean	Median	Minimum	Maximum	Std. Deviation
T-Endo Must	1,60355	1,60100	1,101	2,219	,226983
Trunatomy	1,11845	1,12500	,950	1,300	,103679
Waveone Gold	1,33255	1,32750	1,201	1,519	,095771
Total	1,35152	1,30050	,950	2,219	,251170

## Sheet: 2
Case Summaries	Case Summaries	Case Summaries	Case Summaries	Case Summaries	Case Summaries
Outside-Inside (B-A) values	Outside-Inside (B-A) values	Outside-Inside (B-A) values	Outside-Inside (B-A) values	Outside-Inside (B-A) values	Outside-Inside (B-A) values
File	File	Region	Region	Region	Region
Region	File	Apical	Middle	Coronal	Total
TE	Median	,0900	-,0500	,0100	,0100
	Minimum	-,10	-,08	-,53	-,53
	Maximum	,24	,01	,05	,24
W	Median	-,0650	-,0700	,0300	-,0550
	Minimum	-,16	-,14	-,01	-,16
	Maximum	,07	-,05	,05	,07
TR	Median	-,1300	-,0750	-,0100	-,0700
	Minimum	-,17	-,26	-,04	-,26
	Maximum	-,03	,02	,05	,05
Total	Median	-,0600	-,0600	,0100	-,0300
	Minimum	-,17	-,26	-,53	-,53
	Maximum	,24	,02	,05	,24

## Sheet: 3
Case Summaries	Case Summaries	Case Summaries	Case Summaries	Case Summaries	Case Summaries
Less/More values	Less/More values	Less/More values	Less/More values	Less/More values	Less/More values
File	File	Region	Region	Region	Region
Region	File	Apical	Middle	Coronal	Total
TE	Median	,3670	,6865	,9086	,6865
	Minimum	,22	,56	,38	,22
	Maximum	,86	,94	,97	,97
W	Median	,6328	,6183	,8136	,6668
	Minimum	,27	,41	,67	,27
	Maximum	,85	,68	,92	,92
TR	Median	,1792	,4112	,8231	,4387
	Minimum	-,06	,18	,56	-,06
	Maximum	,68	,77	,96	,96
Total	Median	,3795	,6242	,8486	,6453
	Minimum	-,06	,18	,38	-,06
	Maximum	,86	,94	,97	,97

## Sheet: 4
Case Summaries	Case Summaries	Case Summaries	Case Summaries	Case Summaries	Case Summaries	Case Summaries	Case Summaries	Case Summaries	Case Summaries	Case Summaries	Case Summaries	Case Summaries	Case Summaries
Surface	File	Region	Region	Region	Region	Region	Region	Region	Region	Region	Region	Region	Region
Region	Surface	Apical	Apical	Apical	Middle	Middle	Middle	Coronal	Coronal	Coronal	Total	Total	Total
Total	Region	Median	Minimum	Maximum	Median	Minimum	Maximum	Median	Minimum	Maximum	Median	Minimum	Maximum
A	TE	,1737	,12	,23	,1463	,13	,17	,1067	,09	,64	,1450	,09	,64
	W	,1563	,09	,22	,1838	,14	,21	,1133	,09	,13	,1538	,09	,22
	TR	,1463	,08	,19	,1263	,07	,31	,0883	,05	,10	,1188	,05	,31
	Total	,1600	,08	,23	,1463	,07	,31	,1033	,05	,64	,1342	,05	,64
B	TE	,0575	,04	,14	,0988	,08	,16	,1100	,09	,16	,1000	,04	,16
	W	,1050	,06	,18	,1063	,08	,14	,1383	,12	,16	,1200	,06	,18
	TR	,0263	-,01	,06	,0500	,02	,09	,0767	,06	,12	,0513	-,01	,12
	Total	,0575	-,01	,18	,0925	,02	,16	,1100	,06	,16	,0900	-,01	,18
Total	TE	,1275	,04	,23	,1325	,08	,17	,1083	,09	,64	,1100	,04	,64
	W	,1325	,06	,22	,1412	,08	,21	,1233	,09	,16	,1271	,06	,22
	TR	,0700	-,01	,19	,0813	,02	,31	,0800	,05	,12	,0800	-,01	,31
	Total	,1225	-,01	,23	,1188	,02	,31	,1067	,05	,64	,1100	-,01	,64

## Sheet: 5
Case Summaries	Case Summaries	Case Summaries	Case Summaries	Case Summaries	Case Summaries	Case Summaries	Case Summaries	Case Summaries	Case Summaries	Case Summaries	Case Summaries	Case Summaries	Case Summaries	Case Summaries	Case Summaries	Case Summaries	Case Summaries
		File	File	File	File	File	File	File	File	File	File	File	File	File	File	File	File
File		TE	TE	TE	TE	W	W	W	W	TR	TR	TR	TR	Total	Total	Total	Total
Total	File	Surface	Surface	Surface	Surface	Surface	Surface	Surface	Surface	Surface	Surface	Surface	Surface	Surface	Surface	Surface	Surface
Surface	Total	Inner Surface	Outer Surface	Total	Total	Inner Surface	Outer Surface	Total	Total	Inner Surface	Outer Surface	Total	Total	Inner Surface	Outer Surface	Total	Total
Region 1	Mean	,1627	,0495	,2123	,1415	,1245	,0977	,2223	,1482	,1477	,0168	,1645	,1097	,1450	,0547	,1997	,1331
	Median	,1650	,0400	,2150	,1550	,1200	,1000	,2300	,1300	,1450	,0150	,1600	,1400	,1400	,0450	,2000	,1400
	Minimum	,10	,00	,15	,00	,05	,04	,14	,04	,09	-,01	,12	-,01	,05	-,01	,12	-,01
	Maximum	,22	,12	,29	,29	,17	,18	,30	,30	,19	,06	,21	,21	,22	,18	,30	,30
	Std. Deviation	,03180	,02734	,03741	,07570	,02502	,03463	,03422	,06226	,02409	,01887	,02132	,06983	,03110	,04319	,04027	,07115
Region 2	Mean	,1718	,0632	,2350	,1567	,1345	,1168	,2514	,1676	,1441	,0209	,1650	,1100	,1502	,0670	,2171	,1447
	Median	,1600	,0550	,2300	,1600	,1350	,1200	,2500	,1400	,1500	,0200	,1650	,1400	,1500	,0600	,2150	,1500
	Minimum	,12	,03	,18	,03	,05	,06	,19	,05	,07	-,03	,10	-,03	,05	-,03	,10	-,03
	Maximum	,24	,12	,33	,33	,21	,20	,34	,34	,18	,10	,27	,27	,24	,20	,34	,34
	Std. Deviation	,02905	,02607	,03569	,07757	,03277	,03497	,03919	,06968	,02720	,02635	,03262	,07008	,03335	,04902	,05173	,07638
Region 3	Mean	,1841	,0723	,2564	,1709	,1636	,1086	,2723	,1815	,1468	,0250	,1718	,1145	,1648	,0686	,2335	,1557
	Median	,1800	,0600	,2600	,1800	,1700	,1100	,2700	,1700	,1500	,0200	,1700	,1400	,1600	,0600	,2400	,1600
	Minimum	,12	,04	,21	,04	,10	,06	,22	,06	,08	-,01	,14	-,01	,08	-,01	,14	-,01
	Maximum	,23	,16	,34	,34	,23	,19	,37	,37	,21	,06	,23	,23	,23	,19	,37	,37
	Std. Deviation	,02938	,02827	,03140	,08173	,03110	,03371	,03585	,07608	,02750	,01896	,02322	,06864	,03273	,04395	,05368	,08085

## Sheet: 6
Region 4	Mean	,1909	,0818	,2727	,1818	,2077	,0891	,2968	,1979	,1450	,0295	,1745	,1164	,1812	,0668	,2480	,1654
	Median	,1850	,0800	,2700	,1850	,2050	,0950	,3050	,2000	,1450	,0250	,1700	,1450	,1800	,0700	,2600	,1700
	Minimum	,13	,04	,23	,04	,15	,04	,19	,04	,08	,01	,15	,01	,08	,01	,15	,01
	Maximum	,24	,15	,34	,34	,28	,13	,38	,38	,19	,07	,22	,22	,28	,15	,38	,38
	Std. Deviation	,02759	,02538	,02251	,08263	,03023	,02580	,04529	,09233	,02521	,01838	,01896	,06637	,03821	,03531	,06150	,08814
Region 5	Mean	,1795	,0850	,2645	,1764	,2282	,0795	,3077	,2052	,1395	,0336	,1732	,1155	,1824	,0661	,2485	,1657
	Median	,1800	,0800	,2600	,1800	,2300	,0800	,3100	,2300	,1450	,0300	,1700	,1400	,1800	,0700	,2600	,1600
	Minimum	,14	,06	,23	,06	,18	,05	,24	,05	,09	,00	,14	,00	,09	,00	,14	,00
	Maximum	,21	,13	,32	,32	,27	,10	,37	,37	,16	,07	,22	,22	,27	,13	,37	,37
	Std. Deviation	,01914	,01994	,02198	,07657	,02500	,01812	,03131	,09852	,02081	,02083	,02033	,06327	,04236	,03022	,06165	,08868
Region 6	Mean	,1591	,0927	,2518	,1679	,2050	,0859	,2909	,1939	,1286	,0386	,1673	,1115	,1642	,0724	,2367	,1578
	Median	,1600	,0850	,2400	,1600	,2100	,0800	,2950	,2100	,1350	,0400	,1700	,1300	,1600	,0800	,2400	,1500
	Minimum	,14	,07	,23	,07	,16	,05	,24	,05	,08	,00	,13	,00	,08	,00	,13	,00
	Maximum	,18	,14	,32	,32	,23	,12	,35	,35	,15	,08	,21	,21	,23	,14	,35	,35
	Std. Deviation	,01306	,02097	,02363	,06856	,01896	,02153	,03100	,08804	,02007	,01983	,01609	,05736	,03608	,03172	,05725	,07989
Region 7	Mean	,1305	,1155	,2459	,1639	,1632	,1209	,2841	,1894	,1068	,0618	,1686	,1124	,1335	,0994	,2329	,1553
	Median	,1300	,1100	,2400	,1300	,1600	,1200	,2850	,1600	,1150	,0600	,1650	,1150	,1300	,1000	,2400	,1400
	Minimum	,11	,09	,22	,09	,12	,09	,24	,09	,06	,03	,15	,03	,06	,03	,15	,03
	Maximum	,16	,19	,33	,33	,20	,16	,34	,34	,13	,09	,21	,21	,20	,19	,34	,34
	Std. Deviation	,01133	,02324	,02404	,06206	,01887	,02180	,02737	,07325	,02009	,01593	,01490	,04723	,02880	,03364	,05331	,06934

## Sheet: 7
Region 8	Mean	,1214	,1214	,2427	,1618	,1350	,1427	,2777	,1852	,1295	,0718	,2014	,1342	,1286	,1120	,2406	,1604
	Median	,1200	,1200	,2400	,1300	,1400	,1400	,2800	,1500	,1000	,0700	,1600	,1000	,1200	,1200	,2350	,1350
	Minimum	,10	,10	,22	,10	,10	,11	,23	,10	,05	,05	,15	,05	,05	,05	,15	,05
	Maximum	,14	,19	,31	,31	,16	,18	,33	,33	,90	,10	,98	,98	,90	,19	,98	,98
	Std. Deviation	,01037	,02031	,02028	,06020	,01406	,01804	,02266	,06853	,17294	,01368	,17450	,14971	,09896	,03456	,10548	,10284
Region 9	Mean	,1168	,1250	,2418	,1612	,1223	,1423	,2645	,1764	,0886	,0795	,1682	,1121	,1092	,1156	,2248	,1499
	Median	,1200	,1200	,2400	,1300	,1200	,1400	,2600	,1400	,0900	,0800	,1650	,1000	,1100	,1200	,2400	,1300
	Minimum	,10	,10	,21	,10	,10	,12	,24	,10	,05	,06	,13	,05	,05	,06	,13	,05
	Maximum	,13	,18	,30	,30	,14	,17	,30	,30	,11	,17	,24	,24	,14	,18	,30	,30
	Std. Deviation	,00894	,01711	,01842	,05950	,01232	,01478	,02087	,06539	,01521	,02319	,02039	,04464	,01924	,03240	,04585	,06318
Region 10	Mean	,1409	,1141	,2550	,1700	,1105	,1414	,2518	,1679	,0868	,0791	,1659	,1106	,1127	,1115	,2242	,1495
	Median	,1100	,1100	,2200	,1150	,1100	,1400	,2500	,1400	,0900	,0800	,1700	,0900	,1000	,1100	,2150	,1200
	Minimum	,09	,09	,19	,09	,09	,12	,21	,09	,06	,07	,14	,06	,06	,07	,14	,06
	Maximum	,90	,16	1,01	1,01	,14	,16	,28	,28	,11	,10	,19	,19	,90	,16	1,01	1,01
	Std. Deviation	,16970	,01436	,16950	,14981	,01214	,01390	,01790	,06287	,01323	,00811	,01141	,04102	,09953	,02846	,10563	,10013
Region 11	Mean	,1286	,1032	,2318	,1545	,1036	,1314	,2350	,1567	,0800	,0736	,1536	,1024	,1041	,1027	,2068	,1379
	Median	,0900	,1000	,1900	,1050	,1000	,1250	,2300	,1300	,0800	,0700	,1500	,0800	,0900	,1000	,1900	,1100
	Minimum	,08	,08	,17	,08	,08	,11	,20	,08	,05	,06	,14	,05	,05	,06	,14	,05
	Maximum	,90	,14	1,00	1,00	,14	,16	,27	,27	,10	,10	,18	,18	,90	,16	1,00	1,00
	Std. Deviation	,17247	,01323	,17226	,14965	,01364	,01552	,02018	,05929	,01195	,00953	,00790	,03787	,10058	,02698	,10572	,09826

## Sheet: 8
Case Summaries	Case Summaries	Case Summaries	Case Summaries	Case Summaries	Case Summaries	Case Summaries
Absolute (B-A) values	Absolute (B-A) values	Absolute (B-A) values	Absolute (B-A) values	Absolute (B-A) values	Absolute (B-A) values	Absolute (B-A) values
File	Region	Mean	Median	Minimum	Maximum	Std. Deviation
TE	Apical	,0950	,0950	,03	,24	,04616
	Middle	,0464	,0500	,00	,08	,02172
	Coronal	,0364	,0100	,00	,53	,11099
	Total	,0592	,0500	,00	,53	,07408
W	Apical	,0636	,0700	,00	,16	,03540
	Middle	,0773	,0700	,05	,14	,02292
	Coronal	,0282	,0300	,00	,05	,01500
	Total	,0564	,0600	,00	,16	,03289
TR	Apical	,1236	,1300	,03	,17	,03710
	Middle	,0768	,0750	,00	,26	,04999
	Coronal	,0191	,0200	,00	,05	,01444
	Total	,0732	,0700	,00	,26	,05635
